# Supplementary material for: Early tumor shrinkage identifies long-term disease control and survival in patients with lung cancer treated with atezolizumab
Source: PubMed Central journal article supplement — J Immunother Cancer. 2020 Jun 4;8(1):e000500. doi: 10.1136/jitc-2019-000500 (PMC7279663; doi:10.1136/jitc-2019-000500), 2020-06-04
Supplement: jitc-2019-000500supp001.pdf [file jitc-2019-000500supp001.pdf]

Supplementary results

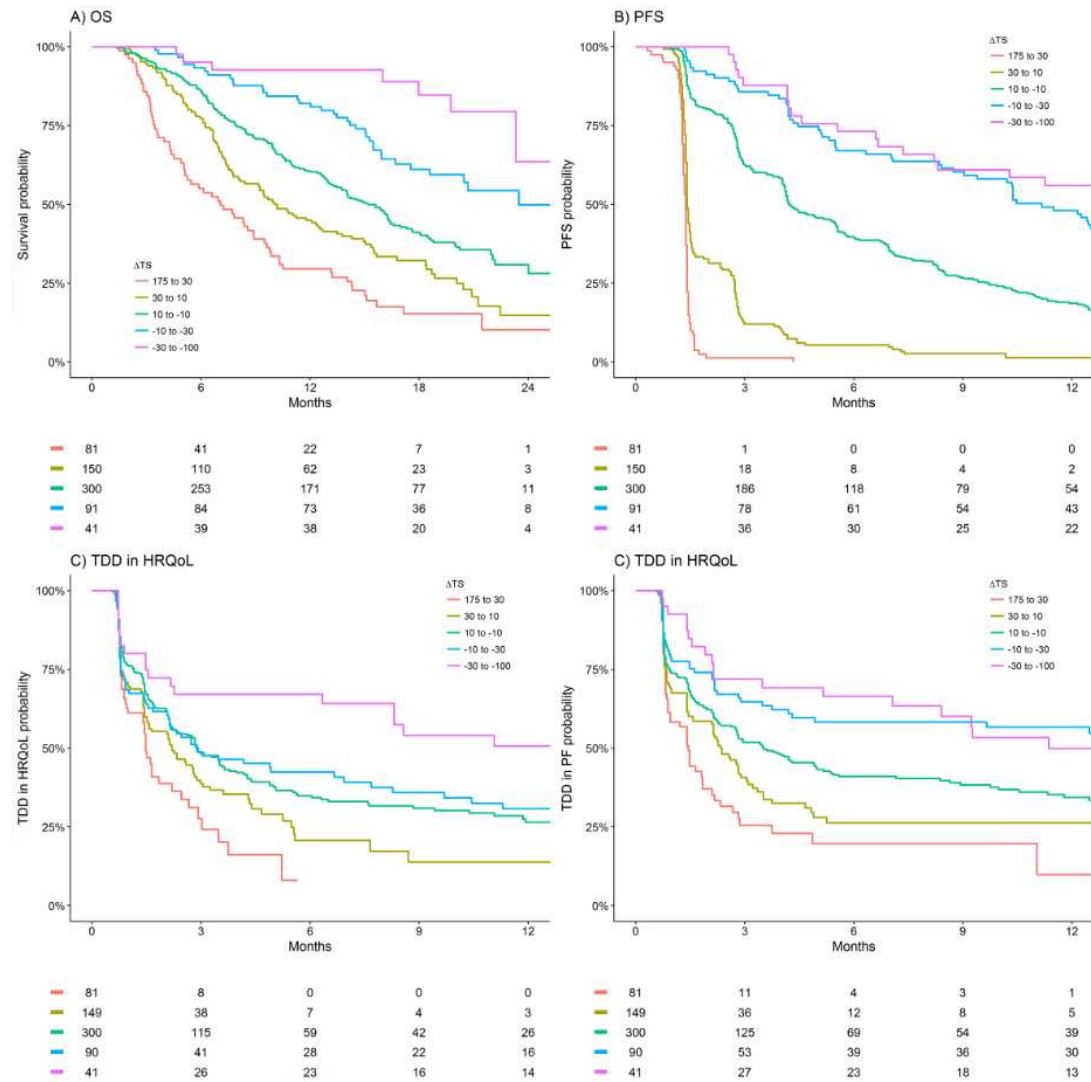

Figure S1: Kaplan Meier estimates of OS, PFS, TDD in HRQoL and PF by  $\Delta$ TS (%) for atezolizumab treated patients from OAK and POPLAR

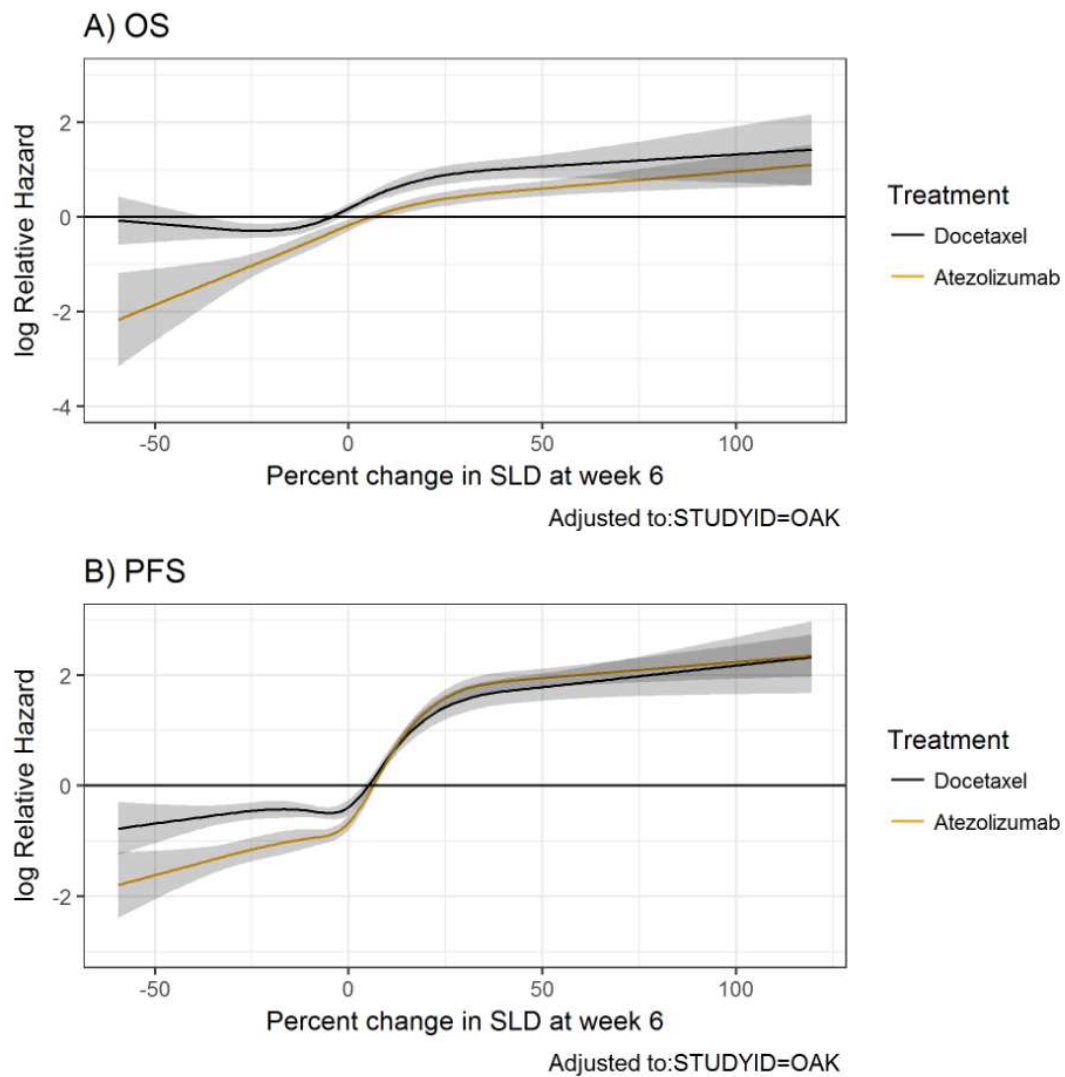

**Figure S2: Relationship (log Relative Hazard  $\pm$ 95% CI) between  $\Delta$ TS with OS and PFS for patients from OAK and POPLAR. AIC defined a restricted cubic spline of 4 knots for OS, and 5 knots for PFS.**

**Table S1: Univariable and multivariable association between  $\Delta$ TS and OS, PFS, TDD in HRQoL and PF for patients treated with atezolizumab from BIRCH and FIR**

|              | $\Delta$ TS | N   | Univariable Analysis |        | Multivariable Analysis <sup>a</sup> |        |
|--------------|-------------|-----|----------------------|--------|-------------------------------------|--------|
|              |             |     | HR (95%CI)           | P      | HR (95%CI)                          | P      |
| OS           | 175 to 30   | 56  | 2.32 (1.43-3.77)     | <0.001 | 2.17 (1.30-3.62)                    | <0.001 |
|              | 30 to 10    | 147 | 2.43 (1.74-3.41)     |        |                                     |        |
|              | 10 to -10   | 282 | Reference            |        |                                     |        |
|              | -10 to -30  | 108 | 0.65 (0.39-1.08)     |        |                                     |        |
|              | -30 to -100 | 75  | 0.42 (0.21-0.83)     |        |                                     |        |
| PFS          | 175 to 30   | 56  | 6.92 (5.02-9.54)     | <0.001 | 7.14 (5.07-10.1)                    | <0.001 |
|              | 30 to 10    | 147 | 2.92 (2.33-3.66)     |        |                                     |        |
|              | 10 to -10   | 282 | Reference            |        |                                     |        |
|              | -10 to -30  | 108 | 0.57 (0.43-0.76)     |        |                                     |        |
|              | -30 to -100 | 75  | 0.40 (0.28-0.59)     |        |                                     |        |
| TDD in HRQoL | 175 to 30   | 55  | 1.24 (0.84-1.83)     | <0.001 | 1.32 (0.88-1.98)                    | <0.001 |
|              | 30 to 10    | 147 | 1.44 (1.12-1.85)     |        |                                     |        |
|              | 10 to -10   | 282 | Reference            |        |                                     |        |
|              | -10 to -30  | 107 | 0.73 (0.54-0.98)     |        |                                     |        |
|              | -30 to -100 | 75  | 0.55 (0.38-0.80)     |        |                                     |        |
| TDD in PF    | 175 to 30   | 55  | 1.29 (0.84-1.98)     | <0.001 | 1.14 (0.73-1.79)                    | <0.001 |
|              | 30 to 10    | 147 | 1.58 (1.21-2.07)     |        |                                     |        |
|              | 10 to -10   | 282 | Reference            |        |                                     |        |
|              | -10 to -30  | 107 | 0.85 (0.62-1.16)     |        |                                     |        |
|              | -30 to -100 | 75  | 0.66 (0.45-0.97)     |        |                                     |        |

CI = confidence interval, HR = hazard ratio, OS = overall survival,  $\Delta$ TS = early changes in tumour size

<sup>a</sup> multivariable analysis adjusted for baseline ECOG PS, age, sex, race, smoking status, histology, count of prior treatments, PDL1 expression, serum LDH levels and the presence of liver, lung or brain lesions

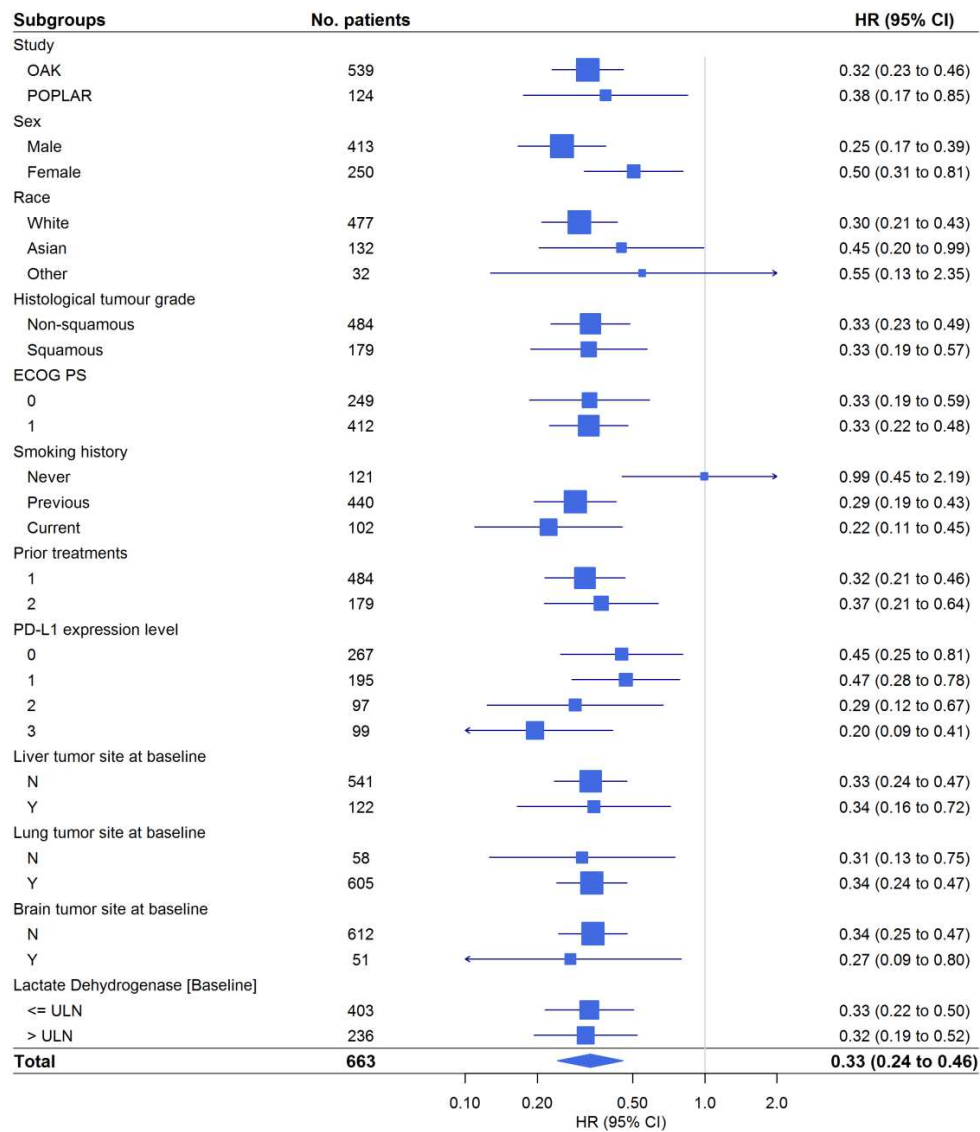

**Figure S3: Effect of ETS on OS by pre-treatment characteristic subgroups for patients treated with atezolizumab from OAK and POPLAR**

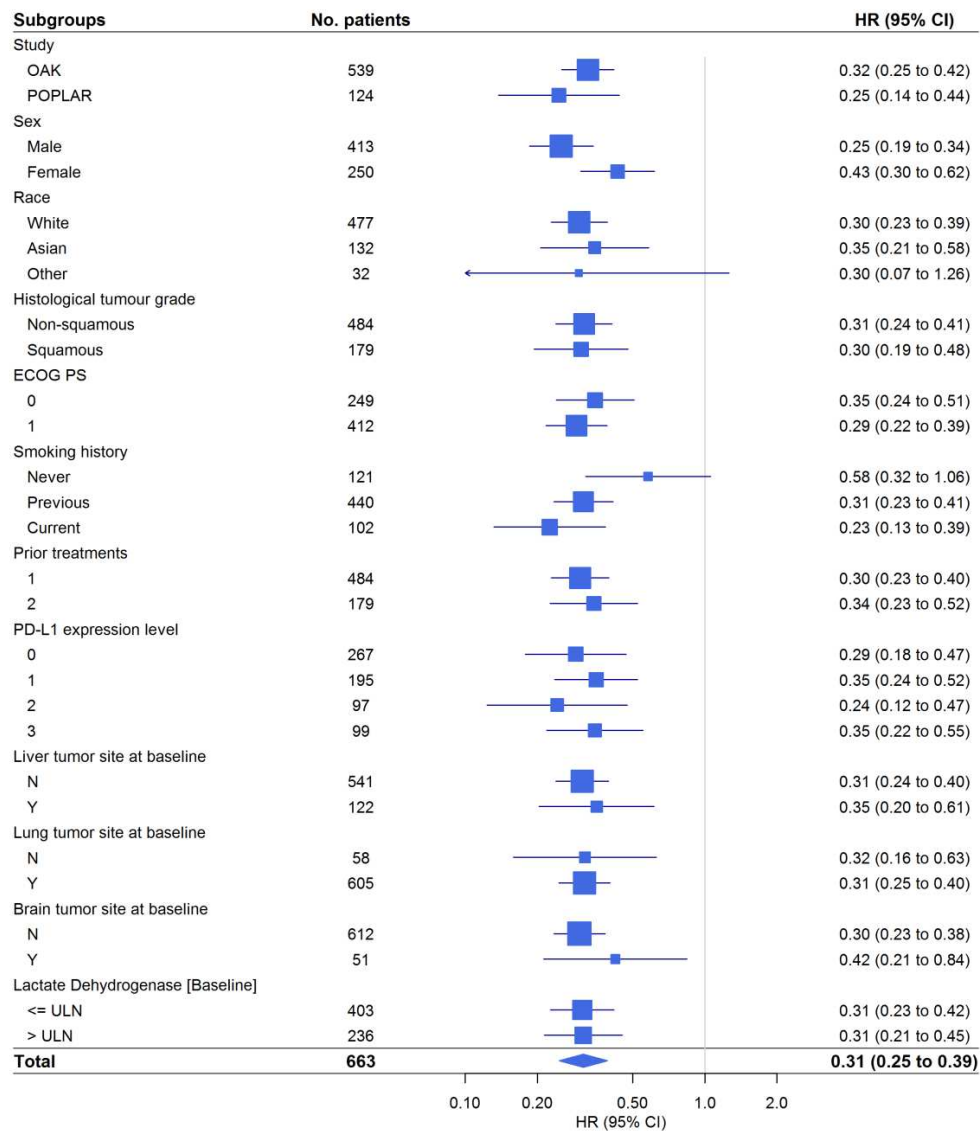

**Figure S4: Effect of ETS on PFS by pre-treatment characteristic subgroups for patients treated with atezolizumab from OAK and POPLAR**

**Table S2: Univariable and multivariable association between ETS status (with and without) and OS / PFS for patients treated with atezolizumab from BIRCH and FIR.**

|     | ETS | Probability (%) at 15-months (95%CI) | Univariable Analysis |                  |        |      | Multivariable Analysis <sup>a</sup> |                  |        |      |
|-----|-----|--------------------------------------|----------------------|------------------|--------|------|-------------------------------------|------------------|--------|------|
|     |     |                                      | N                    | HR (95%CI)       | P      | c    | N                                   | HR (95%CI)       | P      | c    |
| OS  | No  | 54 (47-62)                           | 482                  | .                | <0.001 | 0.58 | 457                                 | .                | <0.001 | 0.72 |
|     | Yes | 78 (69-87)                           | 186                  | 0.37 (0.25-0.56) |        |      | 177                                 | 0.40 (0.26-0.61) |        |      |
| PFS | No  | 7 (3-17)                             | 482                  | .                | <0.001 | 0.62 | 457                                 | .                | <0.001 | 0.69 |
|     | Yes | 27 (17-44)                           | 186                  | 0.35 (0.28-0.44) |        |      | 177                                 | 0.37 (0.29-0.47) |        |      |

CI = confidence interval, HR = hazard ratio

<sup>a</sup> multivariable analysis adjusted for baseline ECOG PS, age, sex, race, smoking status, histology, count of prior treatments, PDL1 expression, serum LDH levels and the presence of liver, lung or brain lesions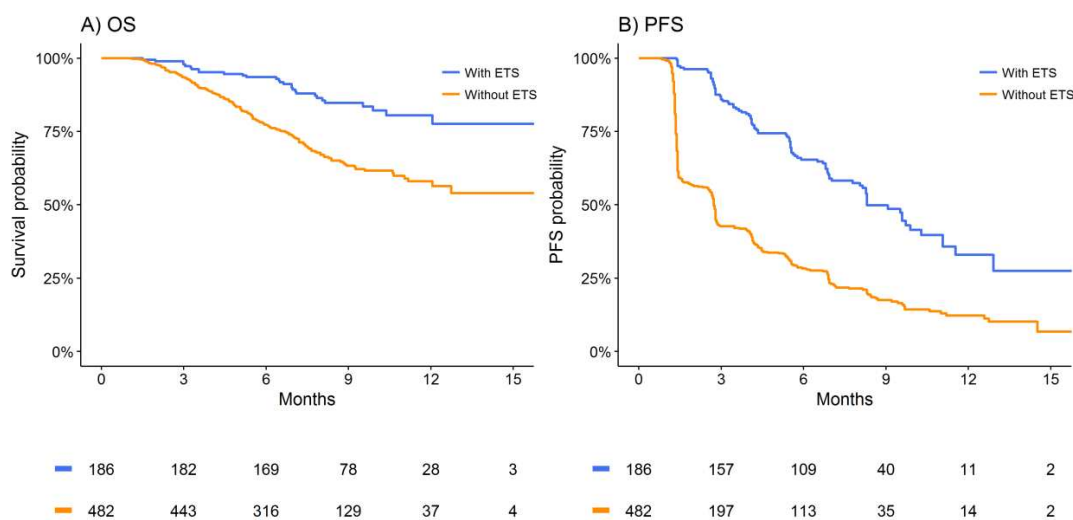**Figure S5: Kaplan Meier estimates of OS and PFS by ETS status for atezolizumab treated patients from BIRCH and FIR****Table S3: Univariable and multivariable association between ETS status (with and without) at week 12 with OS and PFS for patients treated with atezolizumab from OAK and POPLAR.**

|     | ETS | N   | Univariable Analysis |        |      | Multivariable Analysis <sup>a</sup> |                  |        |      |
|-----|-----|-----|----------------------|--------|------|-------------------------------------|------------------|--------|------|
|     |     |     | HR (95%CI)           | P      | c    | N                                   | HR (95%CI)       | P      | c    |
| OS  | No  | 338 | .                    | <0.001 | 0.60 | 314                                 | .                | <0.001 | 0.68 |
|     | Yes | 170 | 0.41 (0.31-0.56)     |        |      | 157                                 | 0.39 (0.28-0.54) |        |      |
| PFS | No  | 338 | .                    | <0.001 | 0.62 | 314                                 | .                | <0.001 | 0.66 |
|     | Yes | 170 | 0.37 (0.30-0.46)     |        |      | 157                                 | 0.38 (0.30-0.48) |        |      |

CI = confidence interval, HR = hazard ratio

<sup>a</sup> multivariable analysis adjusted for baseline ECOG PS, age, sex, race, smoking status, histology, count of prior treatments, PDL1 expression, serum LDH levels and the presence of liver, lung or brain lesions**Table S4: Univariable and multivariable association between ETS status (with and without) at week 12 with OS and PFS for patients treated with atezolizumab from BIRCH and FIR.**

|     | ETS | N   | Univariable Analysis |        |      | Multivariable Analysis <sup>a</sup> |                  |        |      |
|-----|-----|-----|----------------------|--------|------|-------------------------------------|------------------|--------|------|
|     |     |     | HR (95%CI)           | P      | c    | N                                   | HR (95%CI)       | P      | c    |
| OS  | No  | 296 | .                    | <0.001 | 0.63 | 282                                 | .                | <0.001 | 0.74 |
|     | Yes | 236 | 0.33 (0.21-0.53)     |        |      | 223                                 | 0.38 (0.23-0.63) |        |      |
| PFS | No  | 296 | .                    | <0.001 | 0.66 | 282                                 | .                | <0.001 | 0.70 |
|     | Yes | 236 | 0.29 (0.23-0.36)     |        |      | 223                                 | 0.31 (0.24-0.39) |        |      |

CI = confidence interval, HR = hazard ratio

<sup>a</sup> multivariable analysis adjusted for baseline ECOG PS, age, sex, race, smoking status, histology, count of prior treatments, PDL1 expression, serum LDH levels and the presence of liver, lung or brain lesions

**Table S5: Summary of pre-treatment characteristics of atezolizumab and docetaxel treated participants of OAK and POPLAR by ETS status**

|                                 | Atezolizumab           |                     | P-value | Docetaxel              |                     | P-value |
|---------------------------------|------------------------|---------------------|---------|------------------------|---------------------|---------|
|                                 | Without ETS<br>No. 528 | With ETS<br>No. 135 |         | Without ETS<br>No. 413 | With ETS<br>No. 198 |         |
| Study                           |                        |                     | 0.81    |                        |                     | 0.58    |
| OAK                             | 428 (81%)              | 111 (82%)           |         | 333 (81%)              | 164 (83%)           |         |
| POPLAR                          | 100 (19%)              | 24 (18%)            |         | 80 (19%)               | 34 (17%)            |         |
| Age (years)                     | 63 (57 - 69)           | 62 (55 - 71)        | 0.92    | 62 (56 - 68)           | 64 (57 - 71)        | 0.15    |
| Sex                             |                        |                     | 1       |                        |                     | 0.48    |
| Male                            | 329 (62%)              | 84 (62%)            |         | 242 (59%)              | 122 (62%)           |         |
| Female                          | 199 (38%)              | 51 (38%)            |         | 171 (41%)              | 76 (38%)            |         |
| Race                            |                        |                     | 0.53    |                        |                     | < 0.001 |
| White                           | 377 (71%)              | 100 (74%)           |         | 315 (76%)              | 118 (60%)           |         |
| Asian                           | 107 (20%)              | 25 (19%)            |         | 56 (14%)               | 63 (32%)            |         |
| Other                           | 28 (5%)                | 4 (3%)              |         | 28 (7%)                | 9 (5%)              |         |
| Missing                         | 16 (3%)                | 6 (4%)              |         | 14 (3%)                | 8 (4%)              |         |
| Smoking history                 |                        |                     | < 0.001 |                        |                     | 0.024   |
| Never                           | 108 (20%)              | 13 (10%)            |         | 56 (14%)               | 44 (22%)            |         |
| Previous                        | 350 (66%)              | 90 (67%)            |         | 281 (68%)              | 125 (63%)           |         |
| Current                         | 70 (13%)               | 32 (24%)            |         | 76 (18%)               | 29 (15%)            |         |
| Histological tumour grade       |                        |                     | 0.83    |                        |                     | 0.021   |
| Non-squamous                    | 384 (73%)              | 100 (74%)           |         | 285 (69%)              | 155 (78%)           |         |
| Squamous                        | 144 (27%)              | 35 (26%)            |         | 128 (31%)              | 43 (22%)            |         |
| ECOG PS                         |                        |                     | 0.55    |                        |                     | 0.72    |
| 0                               | 195 (37%)              | 54 (40%)            |         | 159 (38%)              | 80 (40%)            |         |
| 1                               | 331 (63%)              | 81 (60%)            |         | 253 (61%)              | 118 (60%)           |         |
| Missing                         | 2 (<1%)                | 0 (0%)              |         | 1 (<1%)                | 0 (0%)              |         |
| Prior treatments                |                        |                     | 0.45    |                        |                     | 0.49    |
| 1                               | 389 (74%)              | 95 (70%)            |         | 309 (75%)              | 143 (72%)           |         |
| 2                               | 139 (26%)              | 40 (30%)            |         | 104 (25%)              | 55 (28%)            |         |
| Days since metastatic diagnosis | 316 (568 - 196)        | 328 (560 - 196)     | 0.34    | 287 (451 - 178)        | 376 (616 - 238)     | 0.003   |
| Months since initial diagnosis  | 14 (27 - 8)            | 14 (23 - 9)         | 0.86    | 12 (22 - 8)            | 15 (27 - 9)         | 0.01    |
| Stage at initial diagnosis      |                        |                     | 1       |                        |                     | 0.16    |
| IA                              | 16 (3%)                | 4 (3%)              |         | 9 (2%)                 | 7 (4%)              |         |
| IB                              | 19 (4%)                | 4 (3%)              |         | 14 (3%)                | 10 (5%)             |         |
| IIA                             | 13 (2%)                | 3 (2%)              |         | 15 (4%)                | 1 (1%)              |         |
| IIB                             | 32 (6%)                | 7 (5%)              |         | 9 (2%)                 | 8 (4%)              |         |
| IIIA                            | 64 (12%)               | 19 (14%)            |         | 55 (13%)               | 20 (10%)            |         |
| IIIB                            | 67 (13%)               | 17 (13%)            |         | 56 (14%)               | 28 (14%)            |         |
| IVA                             | 146 (28%)              | 37 (27%)            |         | 119 (29%)              | 55 (28%)            |         |
| IVB                             | 162 (31%)              | 39 (29%)            |         | 132 (32%)              | 67 (34%)            |         |
| Missing                         | 9 (2%)                 | 5 (4%)              |         | 4 (1%)                 | 2 (1%)              |         |
| Stage                           |                        |                     | 1       |                        |                     | 0.44    |
| Locally advanced                | 33 (6%)                | 8 (6%)              |         | 24 (6%)                | 8 (4%)              |         |
| Metastatic Disease              | 495 (94%)              | 127 (94%)           |         | 389 (94%)              | 190 (96%)           |         |
| Count of tumour sites           | 3 (2 - 4)              | 2 (2 - 3)           | 0.019   | 3 (2 - 4)              | 3 (2 - 4)           | 0.29    |
| Liver tumour site at baseline   | 103 (20%)              | 19 (14%)            | 0.17    | 82 (20%)               | 35 (18%)            | 0.58    |
| Lung tumour site at baseline    | 490 (93%)              | 115 (85%)           | 0.009   | 383 (93%)              | 183 (92%)           | 0.87    |
| Brain tumour site at baseline   | 38 (7%)                | 13 (10%)            | 0.37    | 43 (10%)               | 16 (8%)             | 0.38    |
| Lactate Dehydrogenase           |                        |                     | 0.61    |                        |                     | 0.052   |
| <= ULN                          | 323 (61%)              | 80 (59%)            |         | 220 (53%)              | 124 (63%)           |         |
| > ULN                           | 185 (35%)              | 51 (38%)            |         | 179 (43%)              | 71 (36%)            |         |
| Missing                         | 20 (4%)                | 4 (3%)              |         | 14 (3%)                | 3 (2%)              |         |
| PD-L1 expression level          |                        |                     | < 0.001 |                        |                     | 0.7     |
| 0                               | 237 (45%)              | 30 (22%)            |         | 175 (42%)              | 82 (41%)            |         |
| 1                               | 152 (29%)              | 43 (32%)            |         | 104 (25%)              | 58 (29%)            |         |
| 2                               | 79 (15%)               | 18 (13%)            |         | 75 (18%)               | 31 (16%)            |         |
| 3                               | 56 (11%)               | 43 (32%)            |         | 58 (14%)               | 26 (13%)            |         |
| Missing                         | 4 (1%)                 | 1 (1%)              |         | 1 (<1%)                | 1 (1%)              |         |
| EGFR mutation status            |                        |                     | 0.088   |                        |                     | 0.007   |
| Negative                        | 361 (68%)              | 102 (76%)           |         | 304 (74%)              | 131 (66%)           |         |
| Positive                        | 57 (11%)               | 7 (5%)              |         | 26 (6%)                | 26 (13%)            |         |
| T790M                           | 1 (<1%)                | 0 (0%)              |         | 0 (0%)                 | 0 (0%)              |         |
| Missing                         | 109 (21%)              | 26 (19%)            |         | 83 (20%)               | 41 (21%)            |         |
| KRAS mutation status            |                        |                     | 0.7     |                        |                     | 0.38    |
| Negative                        | 122 (23%)              | 40 (30%)            |         | 82 (20%)               | 45 (23%)            |         |
| Positive                        | 39 (7%)                | 10 (7%)             |         | 37 (9%)                | 14 (7%)             |         |
| Missing                         | 367 (70%)              | 85 (63%)            |         | 294 (71%)              | 139 (70%)           |         |
| EMLA-ALK rearrangement          |                        |                     | 0.58    |                        |                     | 1       |
| Negative                        | 263 (50%)              | 70 (52%)            |         | 172 (42%)              | 95 (48%)            |         |
| Positive                        | 4 (1%)                 | 0 (0%)              |         | 2 (<1%)                | 1 (1%)              |         |
| Missing                         | 261 (49%)              | 65 (48%)            |         | 239 (58%)              | 102 (52%)           |         |

Data are median (IQR) or number of patients (%). P values per Fisher test for categorical data and Wilcoxon test for continuous data.

Median follow-up was 9 [95%CI: 8-9] months within the cohort of 668 advanced NSCLC patients treated with atezolizumab from BIRCH and FIR.

**Table S6: Summary of pre-treatment characteristics of atezolizumab and docetaxel treated participants of BIRCH and FIR by ETS status**

|                                 | Atezolizumab           |                     | P-value |
|---------------------------------|------------------------|---------------------|---------|
|                                 | Without ETS<br>No. 482 | With ETS<br>No. 186 |         |
| Study                           |                        |                     | 0.91    |
| BIRCH                           | 398 (83%)              | 153 (82%)           |         |
| FIR                             | 84 (17%)               | 33 (18%)            |         |
| Age (years)                     | 64 (58 - 71)           | 67 (58 - 73)        | 0.17    |
| Sex                             |                        |                     | 0.43    |
| Male                            | 276 (57%)              | 113 (61%)           |         |
| Female                          | 206 (43%)              | 73 (39%)            |         |
| Race                            |                        |                     | 0.57    |
| White                           | 404 (84%)              | 158 (85%)           |         |
| Asian                           | 53 (11%)               | 18 (10%)            |         |
| Other                           | 16 (3%)                | 9 (5%)              |         |
| Missing                         | 9 (2%)                 | 1 (1%)              |         |
| Smoking history                 |                        |                     | 0.089   |
| Never                           | 86 (18%)               | 21 (11%)            |         |
| Previous                        | 346 (72%)              | 141 (76%)           |         |
| Current                         | 50 (10%)               | 24 (13%)            |         |
| Histological tumour grade       |                        |                     | 0.63    |
| Non-squamous                    | 348 (72%)              | 138 (74%)           |         |
| Squamous                        | 134 (28%)              | 48 (26%)            |         |
| ECOG PS                         |                        |                     | < 0.001 |
| 0                               | 160 (33%)              | 87 (47%)            |         |
| 1                               | 321 (67%)              | 95 (51%)            |         |
| 2                               | 0 (0%)                 | 4 (2%)              |         |
| Missing                         | 1 (<1%)                | 0 (0%)              |         |
| Prior treatments                |                        |                     | 0.007   |
| 0                               | 86 (18%)               | 54 (29%)            |         |
| 1                               | 234 (49%)              | 80 (43%)            |         |
| 2                               | 162 (34%)              | 52 (28%)            |         |
| Days since metastatic diagnosis |                        |                     | 0.058   |
| Median (IQR)                    | 350 (718 - 138)        | 252 (629 - 86)      |         |
| Missing                         | 1 (<1%)                | 0 (0%)              |         |
| Months since initial diagnosis  |                        |                     | 0.26    |
| Median (IQR)                    | 20 (34 - 10)           | 19 (36 - 9)         |         |
| Missing                         | 84 (17%)               | 33 (18%)            |         |
| Stage at initial diagnosis      |                        |                     | 0.39    |
| IA                              | 21 (4%)                | 16 (9%)             |         |
| IB                              | 32 (7%)                | 9 (5%)              |         |
| IIA                             | 27 (6%)                | 10 (5%)             |         |
| IIB                             | 29 (6%)                | 11 (6%)             |         |
| IIIA                            | 78 (16%)               | 34 (18%)            |         |
| IIIB                            | 53 (11%)               | 12 (6%)             |         |
| IV                              | 47 (10%)               | 18 (10%)            |         |
| IVA                             | 78 (16%)               | 33 (18%)            |         |
| IVB                             | 105 (22%)              | 38 (20%)            |         |
| Missing                         | 12 (2%)                | 5 (3%)              |         |
| Stage                           |                        |                     | 0.38    |
| Locally advanced                | 22 (5%)                | 5 (3%)              |         |
| Metastatic Disease              | 460 (95%)              | 181 (97%)           |         |
| Count of tumor sites            |                        |                     | 0.32    |
| Median (IQR)                    | 2 (2 - 3)              | 2 (2 - 3)           |         |
| Missing                         | 19 (4%)                | 5 (3%)              |         |
| Liver tumor site at baseline    | 89 (18%)               | 21 (11%)            | 0.027   |
| Lung tumor site at baseline     | 259 (54%)              | 92 (49%)            | 0.34    |
| Brain tumor site at baseline    | 6 (1%)                 | 2 (1%)              | 1       |
| Lactate Dehydrogenase           |                        |                     | 0.78    |
| <= ULN                          | 305 (63%)              | 119 (64%)           |         |
| > ULN                           | 162 (34%)              | 59 (32%)            |         |
| Missing                         | 15 (3%)                | 8 (4%)              |         |
| PD-L1 expression level          |                        |                     | < 0.001 |
| 2                               | 287 (60%)              | 70 (38%)            |         |
| 3                               | 195 (40%)              | 116 (62%)           |         |
| EGFR mutation status            |                        |                     | 0.41    |
| Negative                        | 225 (47%)              | 74 (40%)            |         |
| Positive                        | 32 (7%)                | 6 (3%)              |         |
| T790M                           | 3 (1%)                 | 0 (0%)              |         |
| Missing                         | 222 (46%)              | 106 (57%)           |         |
| KRAS mutation status            |                        |                     | 1       |
| Negative                        | 98 (20%)               | 35 (19%)            |         |
| Positive                        | 50 (10%)               | 17 (9%)             |         |
| Missing                         | 334 (69%)              | 134 (72%)           |         |
| EMLA-ALK rearrangement          |                        |                     | 0.73    |
| Negative                        | 282 (59%)              | 110 (59%)           |         |
| Positive                        | 8 (2%)                 | 2 (1%)              |         |
| Missing                         | 192 (40%)              | 74 (40%)            |         |

Data are median (IQR) or number of patients (%). P values per Fisher test for categorical data and Wilcoxon test for continuous data.



**Table S7: Summary of BOR for atezolizumab and docetaxel treated participants from OAK and POPLAR by ETS status**

|                                                  | Atezolizumab           |                     | P-value | Docetaxel              |                     | P-value |
|--------------------------------------------------|------------------------|---------------------|---------|------------------------|---------------------|---------|
|                                                  | Without ETS<br>No. 528 | With ETS<br>No. 135 |         | Without ETS<br>No. 413 | With ETS<br>No. 198 |         |
| Best overall response (study primary definition) |                        |                     | <0.001  |                        |                     | <0.001  |
| PD                                               | 276 (52%)              | 16 (12%)            |         | 168 (41%)              | 23 (12%)            |         |
| SD                                               | 228 (43%)              | 37 (27%)            |         | 208 (50%)              | 97 (49%)            |         |
| PR                                               | 18 (3%)                | 75 (56%)            |         | 19 (5%)                | 73 (37%)            |         |
| CR                                               | 1 (<1%)                | 7 (5%)              |         | 1 (<1%)                | 0 (0%)              |         |
| Missing                                          | 5 (1%)                 | 0 (0%)              |         | 17 (4%)                | 5 (3%)              |         |

Data are median (IQR) or number of patients (%). P values per Fisher test for categorical data and Wilcoxon test for continuous data.  
PD – progressive disease, SD – stable disease, PR- partial response, CR – complete response

**Table S8: Summary of BOR for atezolizumab treated participants from BIRCH and FIR by ETS status**

|                                                  | Atezolizumab           |                     | P-value |
|--------------------------------------------------|------------------------|---------------------|---------|
|                                                  | Without ETS<br>No. 482 | With ETS<br>No. 186 |         |
| Best overall response (study primary definition) |                        |                     | <0.001  |
| PD                                               | 219 (45%)              | 15 (8%)             |         |
| SD                                               | 213 (44%)              | 63 (34%)            |         |
| PR                                               | 34 (7%)                | 98 (53%)            |         |
| CR                                               | 1 (<1%)                | 8 (4%)              |         |
| Missing                                          | 15 (3%)                | 2 (1%)              |         |

Data are median (IQR) or number of patients (%). P values per Fisher test for categorical data and Wilcoxon test for continuous data.  
PD – progressive disease, SD – stable disease, PR- partial response, CR – complete response

**Table S9: Univariable and multivariable association between ETS status and OS and PFS, for patients treated with docetaxel from OAK and POPLAR**

|     | ETS | Probability (%)<br>at 24-months (95%CI) | N   | Univariable Analysis |        | Multivariable Analysis <sup>a</sup> |        |
|-----|-----|-----------------------------------------|-----|----------------------|--------|-------------------------------------|--------|
|     |     |                                         |     | HR (95%CI)           | P      | HR (95%CI)                          | P      |
| OS  | No  | 20 (16-26)                              | 413 | .                    | <0.001 | .                                   | <0.001 |
|     | Yes | 32 (23-44)                              | 198 | 0.61 (0.49-0.76)     |        | 0.65 (0.51-0.82)                    |        |
| PFS | No  | 1 (0-5)                                 | 413 | .                    | <0.001 | .                                   | <0.001 |
|     | Yes | 4 (2-10)                                | 198 | 0.61 (0.51-0.74)     |        | 0.64 (0.53-0.78)                    |        |

CI = confidence interval, HR = hazard ratio, mOS: median overall survival in months

<sup>a</sup> multivariable analysis adjusted for baseline ECOG PS, age, sex, race, smoking status, histology, count of prior treatments, PDL1 expression, serum LDH levels and the presence of liver, lung or brain lesions

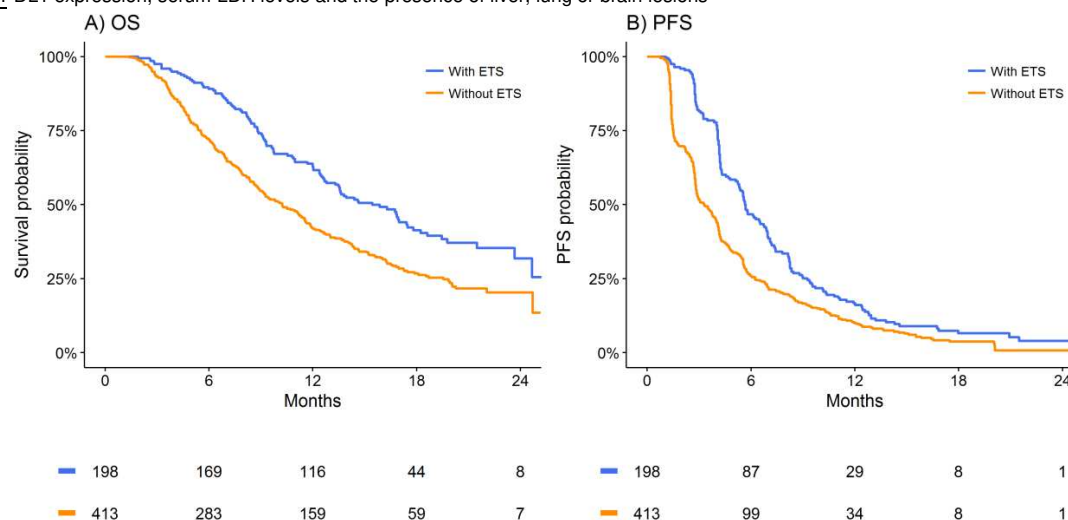**Figure S6: Kaplan Meier estimates of OS and PFS by ETS status for docetaxel treated patients from OAK and POPLAR**

**Table S10: Summary of pre-treatment characteristics of atezolizumab treated participants who did not experience ETS yet achieved a BOR of complete or partial within OAK, POPLAR, BIRCH or FIR**

|                                 | <b>No. 54</b>   |
|---------------------------------|-----------------|
| Study                           |                 |
| OAK                             | 15 (28%)        |
| POPLAR                          | 4 (7%)          |
| BIRCH                           | 29 (54%)        |
| FIR                             | 6 (11%)         |
| Age (years)                     | 64 (59 – 70)    |
| Sex                             |                 |
| Male                            | 25 (46%)        |
| Female                          | 29 (54%)        |
| Race                            |                 |
| White                           | 48 (89%)        |
| Asian                           | 4 (7%)          |
| Other                           | 1 (2%)          |
| Missing                         | 1 (2%)          |
| Smoking history                 |                 |
| Never                           | 4 (7%)          |
| Previous                        | 44 (81%)        |
| Current                         | 6 (11%)         |
| Histological tumour grade       |                 |
| Non-squamous                    | 40 (74%)        |
| Squamous                        | 14 (26%)        |
| ECOG PS                         |                 |
| 0                               | 18 (33%)        |
| 1                               | 36 (67%)        |
| Prior treatments                |                 |
| 0                               | 5 (9%)          |
| 1                               | 31 (57%)        |
| 2                               | 18 (33%)        |
| Days since metastatic diagnosis | 464 (816 – 229) |
| Months since initial diagnosis  |                 |
| Median (IQR)                    | 21 (42 – 11)    |
| Missing                         | 6 (11%)         |
| Stage at initial diagnosis      |                 |
| IA                              | 1 (2%)          |
| IB                              | 3 (6%)          |
| IIA                             | 2 (4%)          |
| IIB                             | 7 (13%)         |
| IIIA                            | 9 (17%)         |
| IIIB                            | 10 (19%)        |
| IV                              | 3 (6%)          |
| IVA                             | 8 (15%)         |
| IVB                             | 9 (17%)         |
| Missing                         | 2 (4%)          |
| Stage                           |                 |
| Locally advanced                | 1 (2%)          |
| Metastatic Disease              | 53 (98%)        |
| Count of tumor sites            |                 |
| Median (IQR)                    | 2 (2 – 3)       |
| Missing                         | 1 (2%)          |
| Liver tumor site at baseline    | 6 (11%)         |
| Lung tumor site at baseline     | 36 (67%)        |
| Brain tumor site at baseline    | 54 (100%)       |
| Lactate Dehydrogenase           |                 |
| <= ULN                          | 41 (76%)        |
| > ULN                           | 12 (22%)        |
| Missing                         | 1 (2%)          |
| PD-L1 expression level          |                 |
| 0                               | 9 (17%)         |
| 1                               | 3 (6%)          |
| 2                               | 22 (41%)        |
| 3                               | 20 (37%)        |
| EGFR mutation status            |                 |
| Negative                        | 27 (50%)        |
| Positive                        | 4 (7%)          |
| Missing                         | 23 (43%)        |
| KRAS mutation status            |                 |
| Negative                        | 8 (15%)         |
| Positive                        | 5 (9%)          |
| Missing                         | 41 (76%)        |
| EMLA-ALK rearrangement          |                 |
| Negative                        | 32 (59%)        |
| Missing                         | 22 (41%)        |

Data are median (IQR) or number of patients (%). P values per Fisher test for categorical data and Wilcoxon test for continuous data.
